# Supplementary material for: Transforming plastic waste into liquid fuels: novel upgrading of polypropylene pyrolysis oil and its utilization in a diesel engine
Source: Royal Society of Chemistry journal article supplement (doi:10.1039/d5ra09026a), 2026-04-24
Supplement: d5ra09026a1.pdf [file d5ra09026a1.pdf]

*Supplementary Information*

**Transforming Plastic Waste into Fuel: Upgrading and Utilization of  
Polypropylene Pyrolysis Oil in Diesel Engines**

Abhishek Kumar Yadav,<sup>1†</sup> Suparna Maity,<sup>1†</sup> Sandeep Kumar Yadav,<sup>1</sup> Vasudeva Madav,<sup>2</sup> G N  
Kumar,<sup>2</sup> and Saikat Dutta<sup>1\*</sup>

<sup>1</sup> Department of Chemistry, National Institute of Technology Karnataka (NITK), Surathkal,  
Mangalore–575025, Karnataka, India.

<sup>2</sup> Department of Mechanical Engineering, National Institute of Technology Karnataka  
(NITK), Surathkal, Mangalore–575025, Karnataka, India.

<sup>†</sup> Equal contribution.

\* Corresponding author. E-mail: [sdutta@nitk.edu.in](mailto:sdutta@nitk.edu.in)

Number of Pages: 12

Number of figures: 10

**Table S1.** Technical specifications of the single-cylinder diesel engine for testing the UPPO-diesel fuel blends.

| <i>Specifications</i>   | <i>Model: Kirloskar TV1</i> |
|-------------------------|-----------------------------|
| Ignition type           | Compression engine          |
| Diesel Engine Type      | 1 cylinder                  |
| No. of Strokes          | 4                           |
| Compression ratio       | 17.5:01                     |
| Cylinder diameter       | 87.5 mm                     |
| Stroke length           | 100 mm                      |
| Governor                | Centrifugal Type            |
| Intake system           | Direct Injection            |
| Speed                   | 1500 rpm                    |
| Orifice diameter        | 20 mm                       |
| Connecting rod length   | 234 mm                      |
| Displacement volume     | 661.45 cc                   |
| Dynamometer arm length  | 185 mm                      |
| Software                | IC ENGINESOFT 9.0           |
| Rated power             | 3.5 kW                      |
| Fuel Pipe diameter      | 12.40 mm                    |
| Fuel ignition timing    | 23° before TDC              |
| Fuel injection pressure | 180 bar                     |
| Pulse per revolution    | 360°                        |
| Cooling                 | Water cooled                |
| Lubricant               | 20W40                       |

**Formula used for the calculation of Brake Thermal Efficiency**

$$Brake\ Power\ (BP) = \frac{2 \times 3.14 \times N \times T}{60000}$$

$$\text{Brake Power (BP)} = \frac{2 \times 3.14 \times N \times W \times R}{60000}$$

$$\text{Total Fuel Consumption (TFC)} = \frac{10 \times \text{Density} \times 3600}{1000 \times t}$$

$$\text{Brake Thermal Efficiency (BTE)} = \frac{BP \times 3600}{TFC \times CV}$$

where, N = speed of dynamometer in rpm

R = length of the rod = 0.185 m

W = load in kg

t = time taken (s) for fuel flow of 10 mL volume

CV = calorific value of the fuel

### Uncertainty analysis

To validate the accuracy, precision, and reliability of experimental data, uncertainty analysis plays the pivotal role. In this work, uncertainties of important performance indicators, such as Brake Thermal Efficiency (BTE) and emission of various gases were analyzed using the propagation of errors from primary measurements and instrumentation specifications.[1]

### Uncertainty in Brake Thermal Efficiency (BTE)

The ratio of brake power output and energy input in the form of heat from the fuel is known as BTE. It was computed using the following relation:

$$BTE = \frac{BP \times 3600}{TFC \times CV}$$

The BP was calculated from torque (T) and engine speed (N) using the standard equation:

$$BP = \frac{2\pi NT}{60000}$$

The uncertainty in BTE was determined by propagating the uncertainties associated with the individual measured parameters, following the root-sum-square (RSS) method:

$$\left(\frac{\partial BTE}{BTE}\right)^2 = \left(\frac{\partial BP}{BP}\right)^2 + \left(\frac{\partial TFC}{TFC}\right)^2 + \left(\frac{\partial CV}{CV}\right)^2$$

$$\left(\frac{\partial BP}{BP}\right)^2 = \left(\frac{\partial N}{N}\right)^2 + \left(\frac{\partial T}{T}\right)^2$$

The uncertainty in torque (T) and engine speed (N) were determined based on the specifications provided by the eddy current dynamometer and digital tachometer, respectively.

$$\left(\frac{\partial BP}{BP}\right)^2 = (0.005)^2 + (0.002)^2 = 0.000029$$

$$\left(\frac{\partial BTE}{BTE}\right)^2 = (0.005)^2 + (0.0054)^2 + (0.0054)^2$$

$$\left(\frac{\partial BTE}{BTE}\right) = 0.0091$$

### Uncertainty in Emission Measurements

Emissions, including CO, CO<sub>2</sub>, NO<sub>x</sub>, O<sub>2</sub>, and unburned hydrocarbons (UHC), were measured using a calibrated INDUS 5 exhaust gas analyzer. The uncertainty values are mentioned with the analyzer's specifications, stated as an accuracy in Table S2.

**Table S2.** Technical specification of the INDUS 5 Gas Analyzer (model: PEA 205N)

|                         |                                                                                                                            |
|-------------------------|----------------------------------------------------------------------------------------------------------------------------|
| Gases Measured          | Carbon monoxide, carbon dioxide, Oxygen, Oxides of Nitrogen & Hydrocarbon                                                  |
| Principle               | Non-Dispersive Infrared for CO, CO <sub>2</sub> , & HC.<br>Electrochemical sensor for O <sub>2</sub> and NO <sub>x</sub> . |
| Range                   | CO: 0 to 15%, HC: 0 to 3000 ppm as hexane, O <sub>2</sub> : 0 to 25%, NO <sub>x</sub> : 0 to 5000 ppm                      |
| Data Resolution         | CO: 0.001%, O <sub>2</sub> , CO <sub>2</sub> : 0.01%, HC & NO <sub>x</sub> : 1 ppm.                                        |
| Accuracy                | CO: ±0.06%, CO <sub>2</sub> : ±0.5%, HC: ±12 ppm, O <sub>2</sub> : ±0.1%                                                   |
| Gas flow rate           | 500 to 1000 mL/min                                                                                                         |
| Intrinsic response time | less than 15 seconds                                                                                                       |
| Data Communication      | RS232 interface for computer connectivity                                                                                  |
| Operating temperature   | 0 to 50 °C                                                                                                                 |

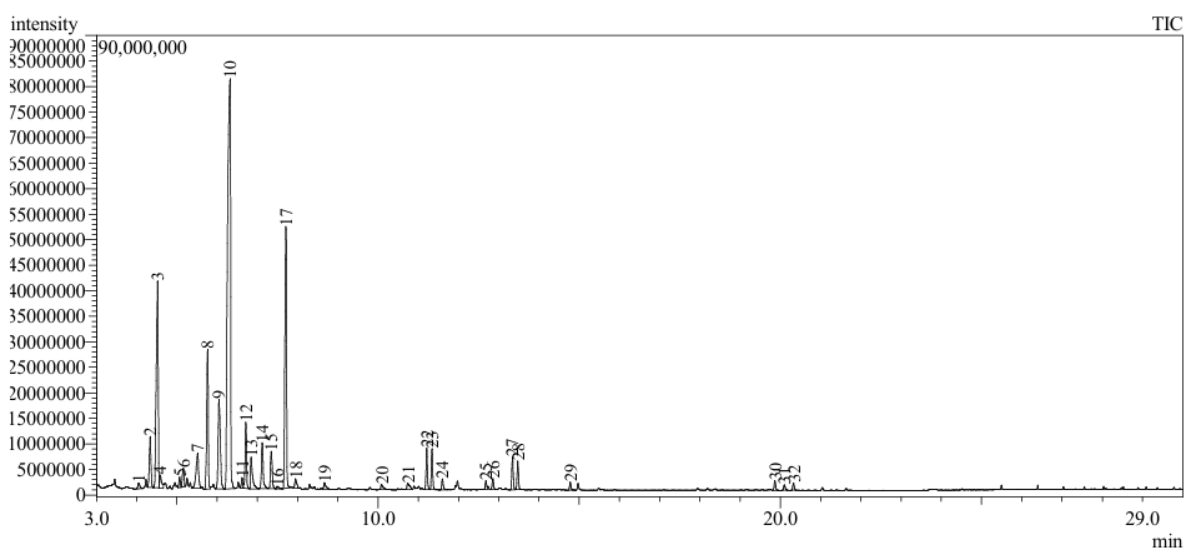

**Figure S1.** The GC chromatogram of DPPO-N fraction showing the major molecular components.

**Table S3.** Major peaks report of GC-MS data DPPO-N

| <i>Peak number</i> | <i>Residence Time (min)</i> | <i>Area</i> | <i>Area (%)</i> | <i>Similarity index (%)</i> | <i>Name of Compound</i>                  |
|--------------------|-----------------------------|-------------|-----------------|-----------------------------|------------------------------------------|
| 3                  | 4.523                       | 135401945   | 11.79           | 94                          | Heptane, 4-methyl-                       |
| 7                  | 5.517                       | 28611717    | 2.49            | 92                          | Cyclopentane, 1,1,3,4-tetramethyl-, cis- |
| 8                  | 5.762                       | 73916936    | 6.44            | 96                          | Heptane, 2,4-dimethyl-                   |
| 9                  | 6.048                       | 65651239    | 5.72            | 90                          | 2,3-Dimethyl-3-heptene                   |
| 10                 | 6.323                       | 420854026   | 36.64           | 91                          | 1-Undecene                               |
| 12                 | 6.714                       | 30831894    | 2.68            | 96                          | Cyclohexane, 1,3,5-trimethyl-            |
| 13                 | 6.846                       | 19678518    | 1.71            | 98                          | Ethylbenzene                             |
| 14                 | 7.120                       | 27286812    | 2.38            | 86                          | Hexen-1-ylcyclohexane                    |
| 15                 | 7.345                       | 21707979    | 1.89            | 91                          | 1,3-Hexadiene, 2,3,5-trimethyl-          |
| 17                 | 7.712                       | 144496126   | 12.58           | 87                          | 1-Undecene, 8-methyl-                    |
| 22                 | 11.209                      | 19728259    | 1.72            | 95                          | Nonane, 2,6-dimethyl-                    |
| 23                 | 11.342                      | 18849129    | 1.64            | 96                          | Nonane, 2,6-dimethyl-                    |
| 27                 | 13.341                      | 15409367    | 1.34            | 91                          | 1-Undecene, 7-methyl-                    |
| 28                 | 13.471                      | 13580194    | 1.18            | 91                          | 1-Undecene, 7-methyl-                    |

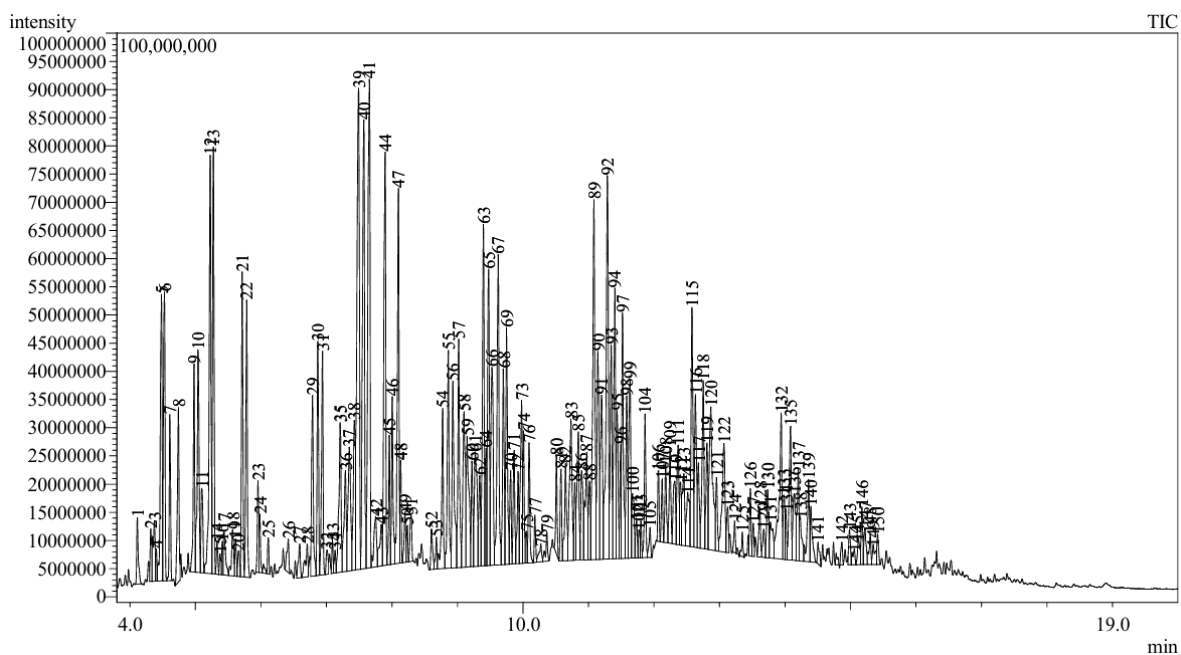

**Figure S2.** The GC chromatogram of UPPO.

**Table S4.** Major peaks report of GC-MS data UPPO

| <i>Peak number</i> | <i>Residence Time (min)</i> | <i>Area</i> | <i>Area (%)</i> | <i>Similarity index (%)</i> | <i>Name of Compound</i>                       |
|--------------------|-----------------------------|-------------|-----------------|-----------------------------|-----------------------------------------------|
| 5                  | 4.480                       | 94852555    | 1.44            | 92                          | Oxalic acid, 2-ethylhexyl isohexyl ester      |
| 6                  | 4.525                       | 81303556    | 1.23            | 92                          | Oxalic acid, 2-ethylhexyl hexyl ester         |
| 12                 | 5.227                       | 156829029   | 2.38            | 90                          | 3-Octadecene, (E)-                            |
| 13                 | 5.275                       | 123181447   | 1.87            | 90                          | 1-Tetradecene                                 |
| 21                 | 5.715                       | 79486864    | 1.21            | 89                          | Pentadecafluorooctanoic acid, tridecyl ester  |
| 39                 | 7.492                       | 223147868   | 3.39            | 90                          | Trifluoroacetic acid, pentadecyl ester        |
| 40                 | 7.570                       | 186284723   | 2.83            | 90                          | 2-Isopropyl-5-methyl-1-heptanol               |
| 41                 | 7.655                       | 203026227   | 3.08            | 90                          | 2-Isopropyl-5-methyl-1-heptanol               |
| 44                 | 7.894                       | 143869037   | 2.18            | 90                          | 1-Dodecanol, 2-hexyl-                         |
| 47                 | 8.098                       | 125956316   | 1.91            | 90                          | Pentadecafluorooctanoic acid, hexadecyl ester |
| 63                 | 9.397                       | 120146799   | 1.82            | 90                          | Octacosyl trifluoroacetate                    |
| 65                 | 9.474                       | 96099979    | 1.46            | 89                          | 1-Dodecanol, 2-hexyl-                         |
| 66                 | 9.526                       | 86349905    | 1.31            | 90                          | Dodecyl nonyl ether                           |
| 67                 | 9.621                       | 113039964   | 1.72            | 90                          | Pentadecafluorooctanoic acid, octadecyl ester |

|     |        |           |      |    |                                     |
|-----|--------|-----------|------|----|-------------------------------------|
| 89  | 11.084 | 151738348 | 2.30 | 90 | Pentacosyl trifluoroacetate         |
| 90  | 11.144 | 81721418  | 1.24 | 90 | 1-Decanol, 2-hexyl-                 |
| 92  | 11.291 | 161553566 | 2.45 | 90 | Pentacosyl trifluoroacetate         |
| 94  | 11.402 | 87879317  | 1.33 | 90 | Tetratriacontyl heptafluorobutyrate |
| 115 | 12.582 | 84559732  | 1.28 | 90 | Tetratriacontyl heptafluorobutyrate |
| 120 | 12.869 | 91810886  | 1.39 | 90 | Tetratriacontyl heptafluorobutyrate |

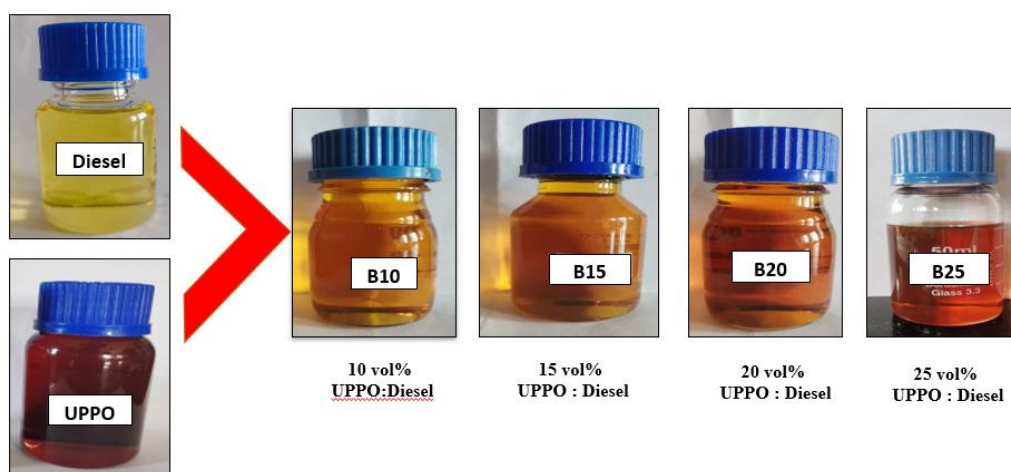

**Figure S3.** Photographic images of various UPPO-diesel blends showing their relative color intensity and clarity.

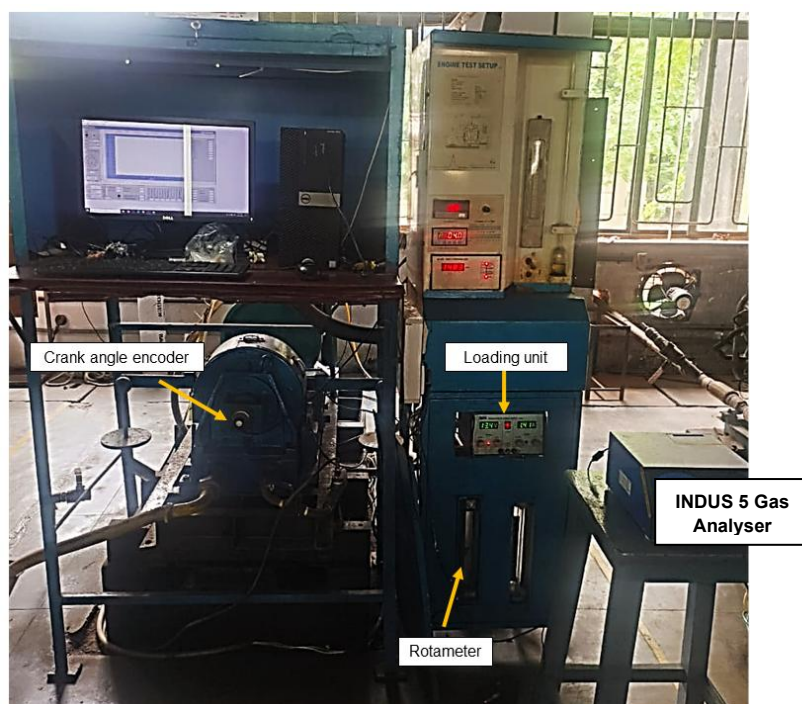

**Figure S4.** Computerized internal combustion engine experimental test facility (front view).

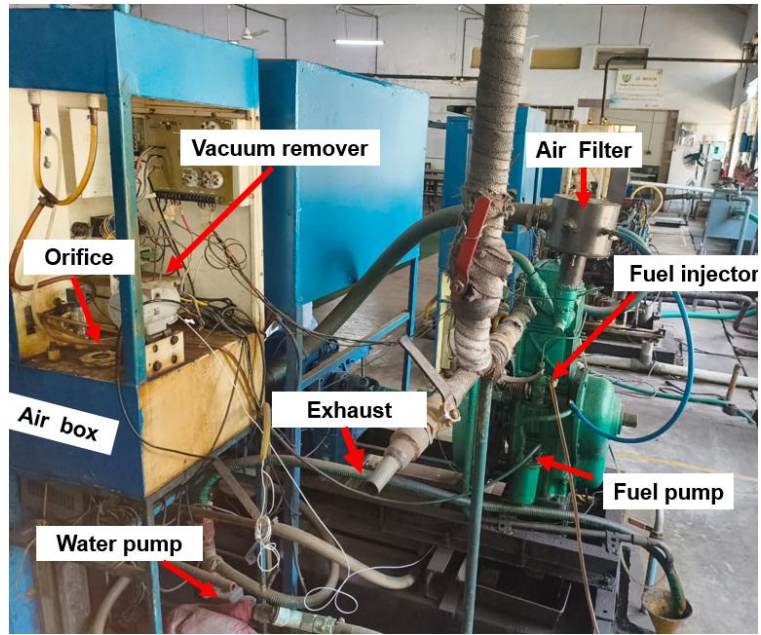

**Figure S5.** Computerized internal combustion engine experimental test facility (side view).

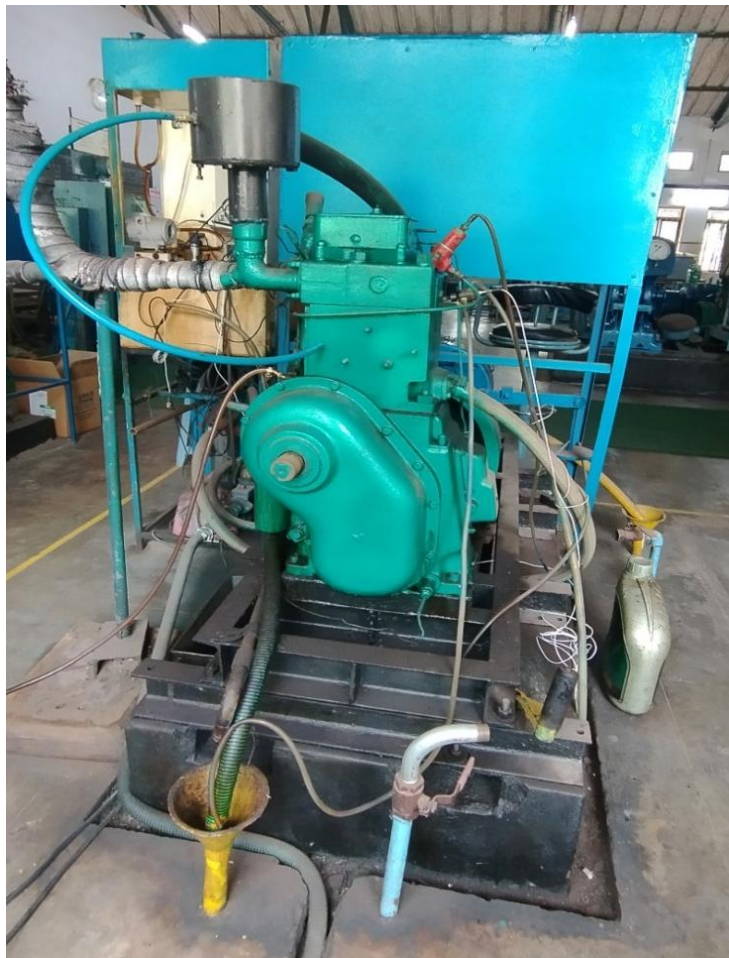

**Figure S6.** The IC engine (backside view), displaying the fuel injector and air filter.

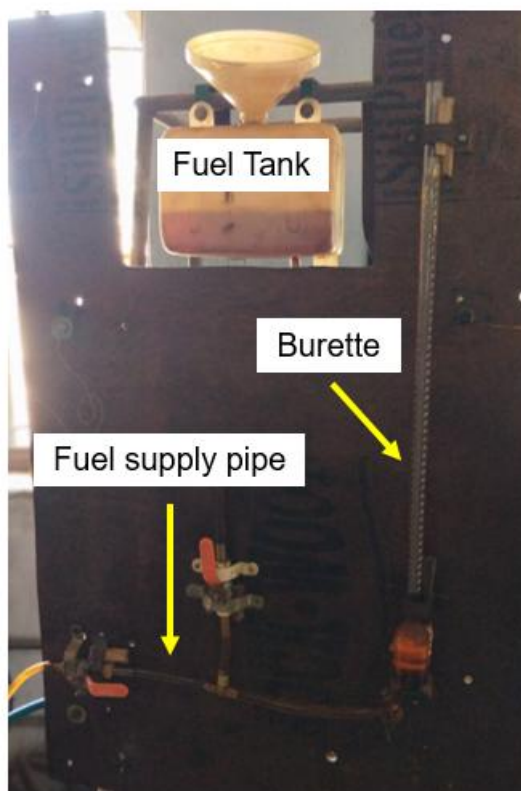

**Figure S7.** Photographic image of the IC engine fuel tank and burette for the measurement of fuel flow rate.

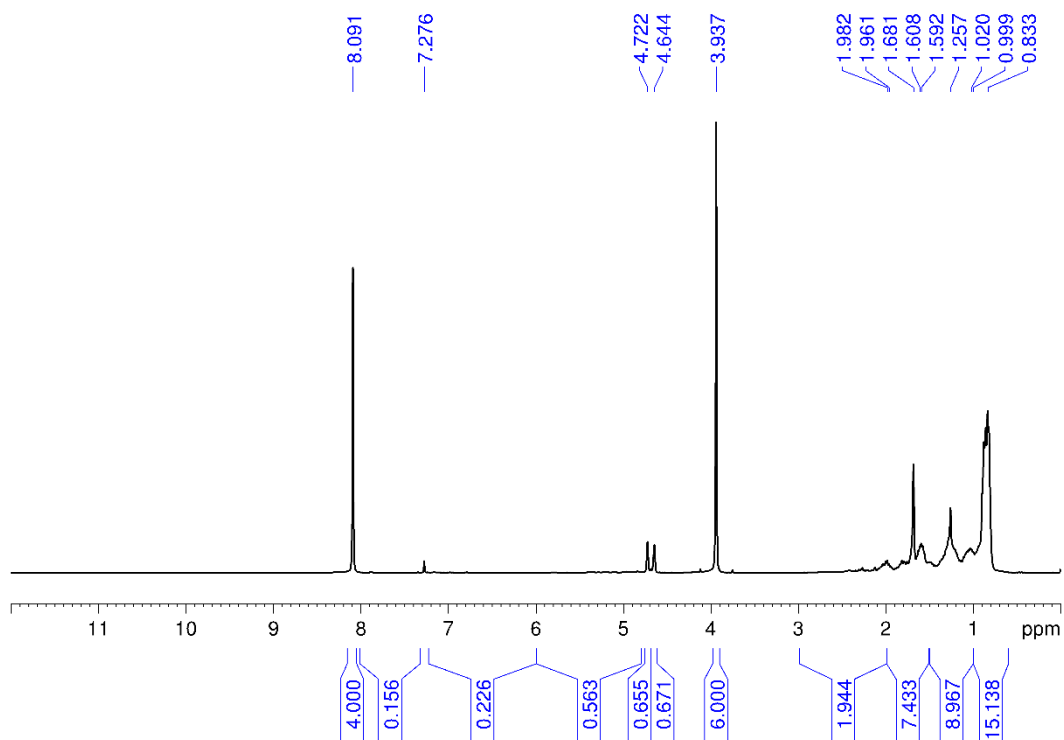

**Figure S8.** The  $^1\text{H-NMR}$  spectrum of CPPO using 1,4-dimethyl phthalate as the internal standard for quantification of components.

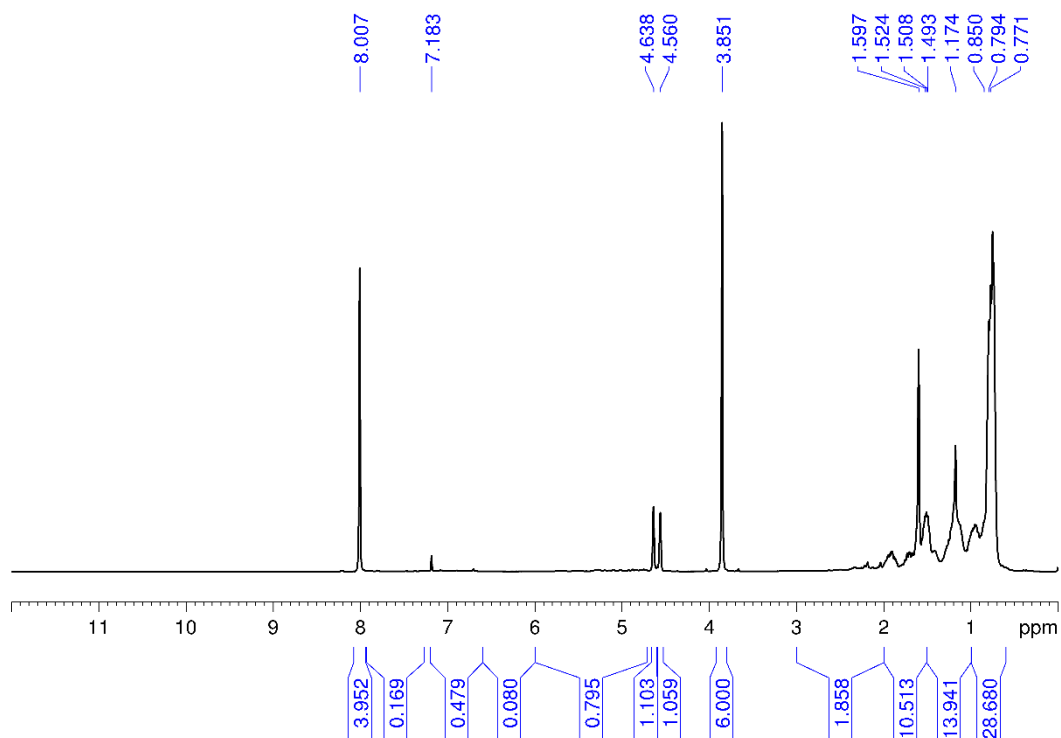

**Figure S9.** The  $^1\text{H-NMR}$  spectrum of UPPO using 1,4-dimethyl phthalate as the internal standard for quantification of components.

**Table S5.** Chemical composition of UPPO and CPPO obtained by quantitative analysis using dimethyl terephthalate as an internal indicator.

| Proton Type       | Integral area of CPPO | Integral area of UPPO |
|-------------------|-----------------------|-----------------------|
| Aromatics, vol%   | 4.5                   | 3.3                   |
| Paraffins, vol%   | 63                    | 63                    |
| Olefins, vol%     | 31                    | 30.6                  |
| H/C               | 1.36                  | 1.8                   |
| Isoparaffin Index | 1.13                  | 1.3                   |

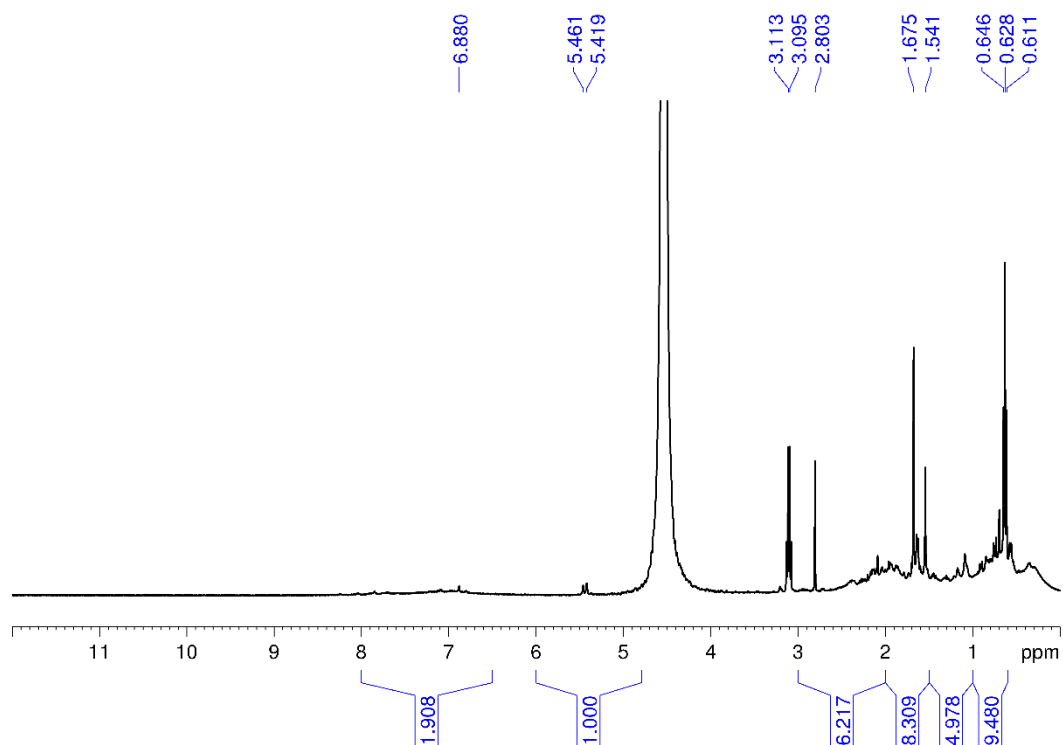

**Figure S10.** The  $^1\text{H-NMR}$  spectrum of the degummed fraction in  $\text{D}_2\text{O}$ .

**References:**

[1] Yadav AK, Yadav SK, Kumar GN, Madav V, Dutta S. Biomass-derived 5-(tolylmethyl)furfural as a promising diesel additive: preparation, process scale-up, and engine studies. *RSC Adv* 2025;15:27933–40. <https://doi.org/10.1039/D5RA04020E>.
